# Supplementary material
Source: publisher figshare collection journal article supplement (https://acs.figshare.com/ndownloader/files/20168804)
Supplement: Supplementary file 1 [file 20168804]

## Supporting Information

# Formation of Platinum Nanocrystals on Silicon Nanotubes and Corresponding Anti-Cancer Activity *In* *Vitro*

Nguyen T. Le,<sup>1</sup> Giridhar R. Akkaraju,<sup>2</sup> Jeffery L. Coffey<sup>1\*</sup>

<sup>1</sup> Department of Chemistry and Biochemistry, Texas Christian University, Fort Worth, TX, 76129, USA

e-mail: j.coffey@tcu.edu

<sup>2</sup> Department of Biology, Texas Christian University, Fort Worth, TX, 76129, USA

**Figure S1.** Structural morphology of pSiNTs after functionalization with APTES.

**Figure S2.** Shell thickness of Unmodified pSiNTs and APTES-pSiNTs.

**Figure S3.** Pt NCs-pSiNTs after incubation in different K<sub>2</sub>PtCl<sub>4</sub> salt concentrations and time

**Figure S4.** Pt NCs formed on unmodified pSiNTs after 24 h.

**Figure S5.** Pt NCs formed on unmodified SiO<sub>2</sub> NTs and APTES-functionalized SiO<sub>2</sub> NTs.

**Figure S6.** Normalized toxicity based on wt% Pt

**Figure S7.** Citrate-capped Pt NCs.

**Figure S8.** Cytotoxicity of Pt NCs (3.5 ± 1.1 nm) and K<sub>2</sub>PtCl<sub>4</sub> at different doses.

**Figure S9.** Localization of Pt NCs-pSiNTs in HeLa cells

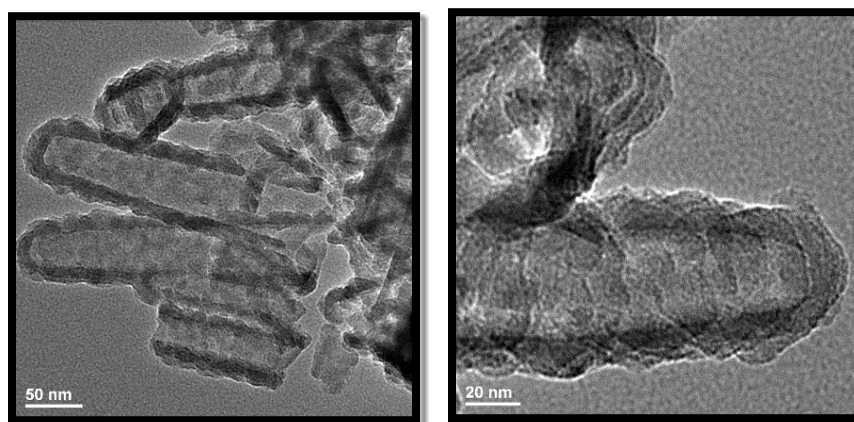

**Figure S1.** Structural morphology of pSiNTs after functionalization with APTES.

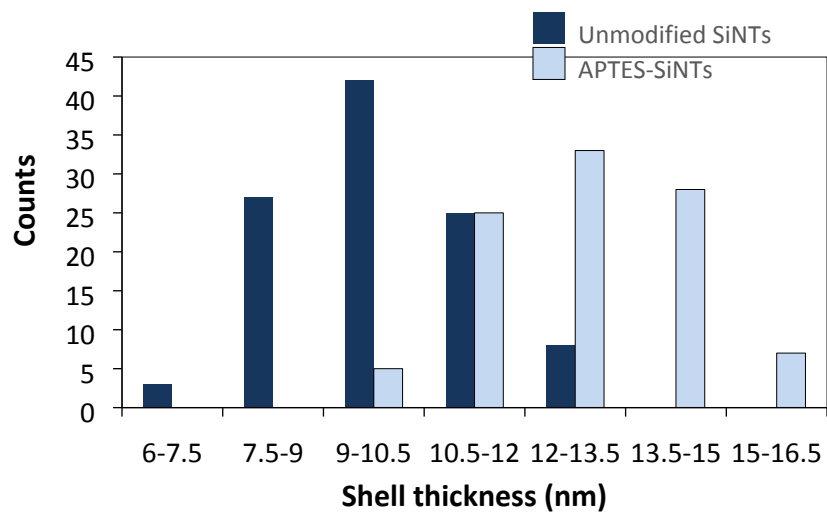

**Figure S2.** Shell thickness of Unmodified pSiNTs and APTES-pSiNTs.

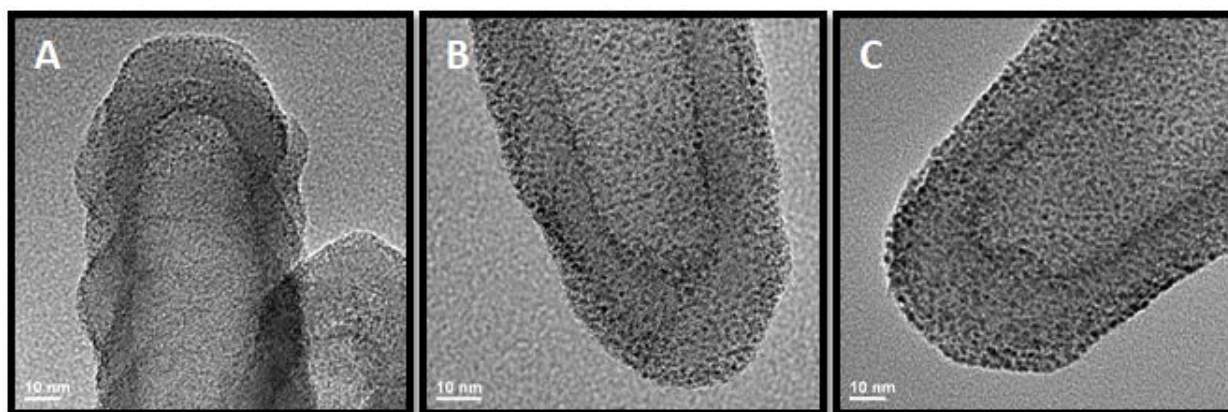

**Figure S3.** Pt NCs-pSiNTs after incubation in different  $K_2PtCl_4$  salt concentrations and time A)  $K_2PtCl_4 = 0.5$  mM (4 h), B)  $K_2PtCl_4 = 0.5$  mM (24 h), C)  $K_2PtCl_4 = 3.3$  mM (24 h). Scale bar = 10 nm.

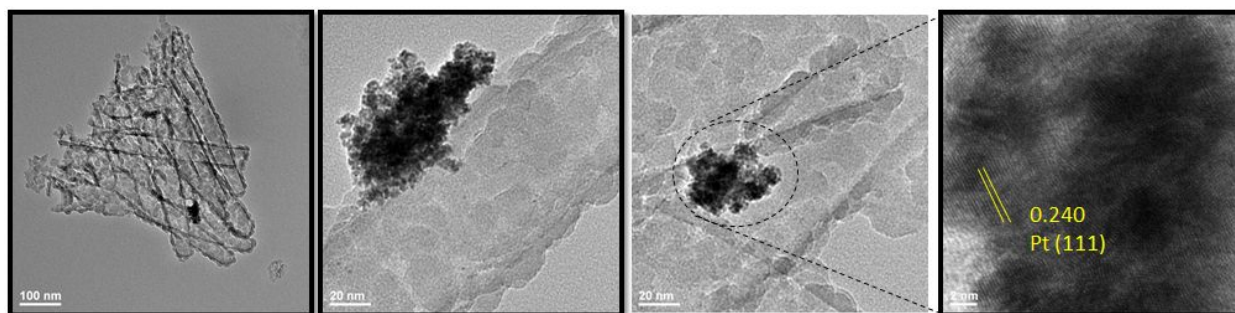

**Figure S4.** Pt NCs formed on unmodified pSiNTs after 24 h.

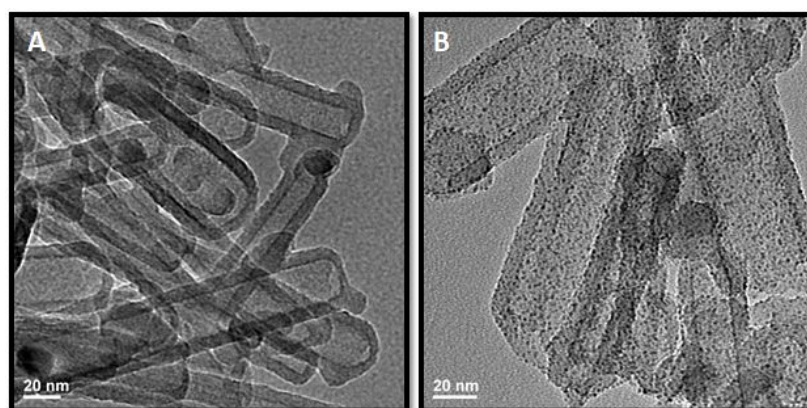

**Figure S5.** Pt NCs formed on A) unmodified SiO<sub>2</sub> NTs and B) APTES-functionalized SiO<sub>2</sub> NTs.

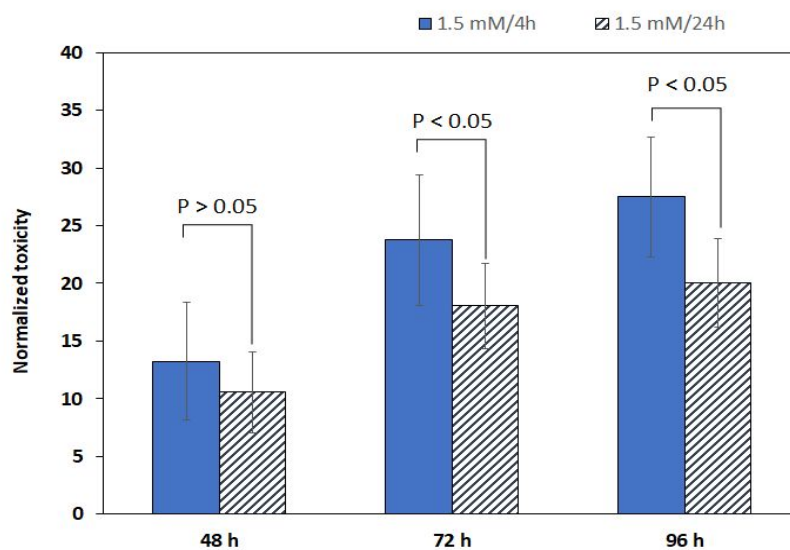

**Figure S6.** Normalized toxicity based on wt% Pt.

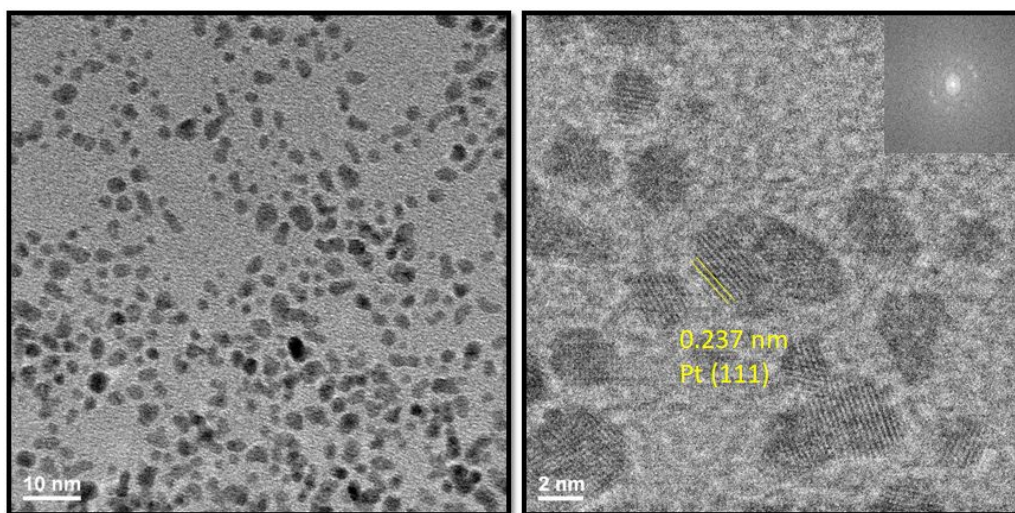

**Figure S7.** Citrate-capped Pt NCs.

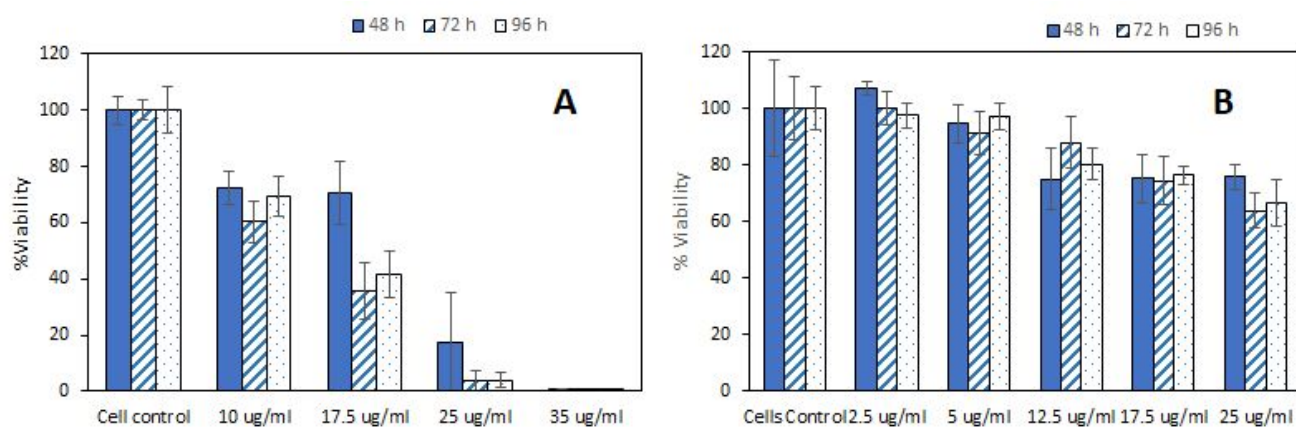

**Figure S8.** Cytotoxicity of A) Pt NCs ( $3.5 \pm 1.1$  nm) and B)  $K_2PtCl_4$  at different doses.

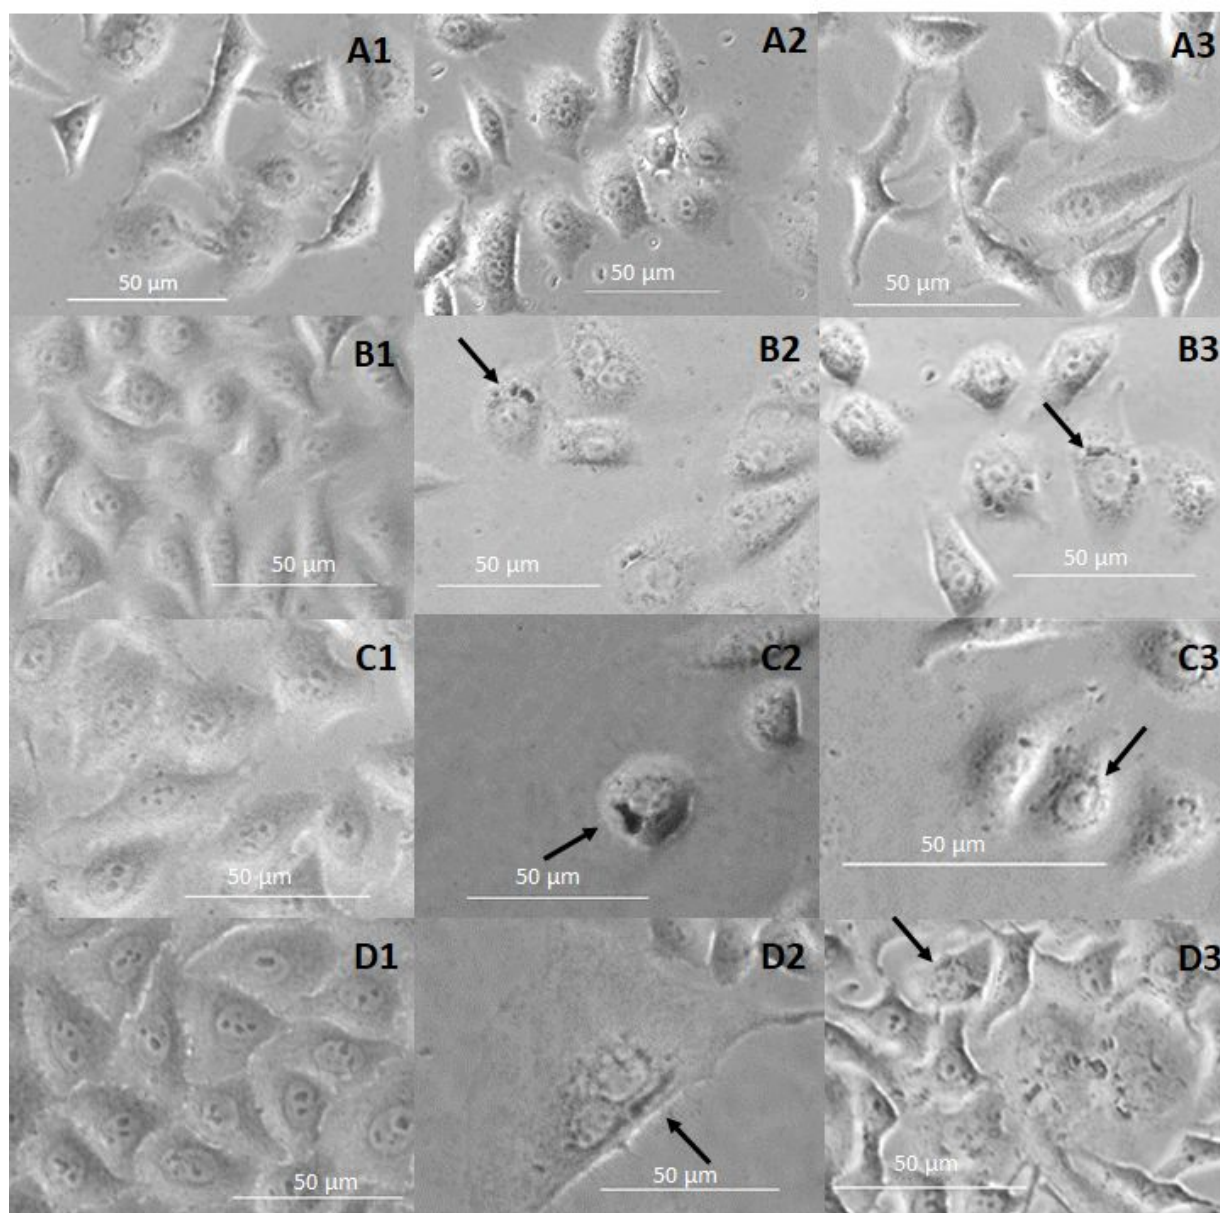

**Figure S9.** Localization of Pt NCs-pSiNTs in HeLa cells after 4h (A1-A3), 24h (B1-B3), 48h (C1-C3) and 72h (D1-D3) under brightfield of fluorescence microscope (non-fluorescence method). A1-D1: Cell with no treatment; A2-D2: 1.5 mM/4h (30-35 %wt Pt) Pt NCs-pSiNTs; A3-D3: 1.5 mM/24h (40-45 %wt Pt) Pt NCs-pSiNTs.
